1 **Effect of crocin and naringenin supplementation in cryopreservation medium on post-**  
2 **thawed rooster sperm quality and expression of apoptosis associated genes**

3

4 **Mahdiah Mehdipour<sup>1</sup>, Hossein Daghigh Kia<sup>1\*</sup>, Abouzar Najafi<sup>1</sup>**

5

6 *<sup>1</sup> Department of Animal Science, College of Agriculture, University of Tabriz, Tabriz, Iran;*

7

8 \* Corresponding author: Department of Animal Science, College of Agriculture, University of  
9 Tabriz, Tabriz, Iran : Fax: +98 411 3356004.

10 E-mail addresses: [hsz6955@yahoo.com](mailto:hsz6955@yahoo.com), [daghighkia@tabrizu.ac.ir](mailto:daghighkia@tabrizu.ac.ir) (H.D. Kia).

11

12

13

14

15

16

17

18

19

20 **Abstract**

21 The aim of our research was to examine the effects of crocin (0.5 (C0.5), 1 (C1) and 1.5 (C1.5)  
22 mM) and naringenin (50 (N50), 100 (N100) and 150 (N150)  $\mu$ M) in cryopreservation extender  
23 for freezing rooster semen. Sperm motility, viability, abnormalities, membrane integrity,  
24 mitochondrial activity, apoptosis status, lipid peroxidation (LP), GPX, SOD, TAC, the mRNA  
25 expression of pro-apoptotic (CASPASE 3) and anti-apoptotic (Bcl-2) genes, fertility and  
26 hatchability rate were investigated following freeze-thawing. C1 and N100 resulted in the higher  
27 ( $P < 0.05$ ) total motility and progressive motility in comparison to the control group. C1 and  
28 N100 improved viability, membrane integrity and reduced lipid peroxidation. We found much  
29 higher values for mitochondria activity with C1 and N100 respect to the control group. The C1  
30 and N100 showed lower percentages of early apoptosis when compared with control group.  
31 Also, C1 and N100 had higher TAC when compared with control group. The mRNA expression  
32 of BCL-2 in the C1 and N100 group were significantly higher than that of other treatments. The  
33 expression of CASPASES 3 was significantly reduced in C1 and N100 group ( $P < 0.05$ ) when  
34 compared to control group. Significantly higher percentage of fertility and hatching rate were  
35 observed in C1 and N100 compared to the control group. In conclusion, crocin at 1 mM and  
36 naringenin at 100  $\mu$ M seem to improve the post-thawing rooster semen quality, fertility and  
37 could protect the sperm against excessive ROS generation by reducing the pro-apoptotic  
38 (CASPASE 3) and increasing anti-apoptotic (Bcl-2) genes.

39 **Key words:** Crocin; Cryopreservation; Naringenin; Rooster semen; Gene

40

41

## 42 **1. Introduction**

43 Despite its utilization over 70 years ago [1], cryopreservation of bird sperm causes low  
44 fertility, which limits its applying in genetic stock preservation [2]. Cryopreservation causes  
45 harmful effects on sperm that decrease sperm viability and motility [3-5]. Avian sperm are  
46 particularly susceptible to oxidative stress [6], though reactive oxygen species (ROS), in  
47 physiological quantities, are necessary for important sperm events leading to successful  
48 fertilization [7]. In sperm, oxidative stress disturb motility and mitochondrial activity [8];  
49 induces lipid peroxidation of the membrane [9]; and the oxidation and DNA fragmentation [10].

50 Adding antioxidant compounds to the freezing medium is known as one of the ways to defeat  
51 the deleterious effects of ROS on sperm fertility after thawing, because it blocks or inhibits  
52 oxidative stress. Antioxidants provide a positive effect on semen, leading to an improvement in  
53 some sperm parameters containing motility and membrane integrity [11-13].

54 Naringenin is known as a natural flavonoid that has been studied for some of the most  
55 prominent properties containing antioxidant, antiproliferative, anti-inflammatory, and  
56 antimutagenic ones [14]. It was observed in previous experimental studies that naringain protects  
57 the cells from lead and arsenic-induced oxidative damage [15, 16].

58 The other studied antioxidant was crocin, a glycosyl ester of crocetin (one of the carotenoids  
59 extracted from saffron) [17]. In an experiment which was performed under in vitro conditions,  
60 crocin had an effect on improving deer sperm motility [18]. This antioxidant can influence sperm  
61 physiology through its protective effect on sperm cryopreservation media.

62 To the best of our knowledge, no similar study has been performed to evaluate the potential  
63 effect of naringenin and crocin in cryopreservation of rooster sperm. The objective of this  
64 investigation was to determine the effect of various levels of naringenin and crocin in the

65 extender on post-thawed rooster sperm quality and expression of apoptosis associated genes.  
66 Quality and fertility analyses of the post-thaw sperm integrated with naringenin and crocin were  
67 also performed after the freezing and thawing process.

68

## 69 **2. Materials and methods**

### 70 **2.1. Chemicals and ethics**

71 All chemicals used for performing this experiment were purchased from Sigma (St. Louis,  
72 MO, USA) and Merck (Darmstadt, Germany) chemical companies. Approval for the present  
73 experiment was given by The Research Ethics Committees of the University of Tabriz.

### 74 **2.2. Rooster and semen collection**

75 This study was performed on ten adult Ross 308 broiler breeder roosters (30 week old) which  
76 were kept individually in cages (diet compositions were included: 12% crude protein and 2,750  
77 kcal maintenance energy/kg). Semen was collected twice a week from individual birds in a  
78 graduated plastic tube [19]. Semen samples from each rooster were analyzed individually. The  
79 samples that had the standard criteria motility of >80% concentration of  $>3 \times 10^9$  sperm/mL and  
80 volume of >0.2 mL were used in the present study. Next, to remove individual differences,  
81 semen samples were pooled and then assigned into 7 equal aliquots.

### 82 **2.3. Extender preparation and cryopreservation**

83 Seven experimental groups were applied in this study for semen dilution (Table 1): Beltsville  
84 extender without antioxidant (control), C0.5 (Beltsville extender with 0.5 mM crocin), C1  
85 (Beltsville extender with 1 mM crocin), C1.5 (Beltsville extender with 1.5 mM crocin), N50  
86 (Beltsville extender with 50  $\mu$ M naringenin), N100 (Beltsville extender with 100  $\mu$ M

87 naringenin), N150 (Beltsville extender with 150  $\mu$ M naringenin). Glycerol was added to the  
88 extender at 3.8% (v/v). Next, diluted semen samples were aspirated into 0.25 ml French straws  
89 (IMV, L'Aigle, France) to attain the concentration of  $100 \times 10^6$  sperm/mL. Consequently, via  
90 polyvinyl alcohol powder were sealed and equilibrated at 4 °C for 3 h. Then, after equilibration  
91 time (3 h), the straws were cryopreserved in liquid nitrogen (LN) vapor (4 cm above the LN for 7  
92 min in a cryobox). Then, the straws were plunged into LN for storage until thawed (37 °C for 30  
93 s) and used for assessment of sperm parameters.

#### 94 **Table 1**

95 Composition of the Beltsville extender.

| Ingredients                                |      |
|--------------------------------------------|------|
| Potassium citrate tribasic monohydrate (g) | 0.64 |
| Sodium-L-glutamate (g)                     | 8.67 |
| Magnesium chloride anhydrous (g)           | 0.34 |
| D-(–)-Fructose (g)                         | 5    |
| Potassium phosphate dibasic trihydrate (g) | 7.59 |
| Potassium phosphate monobasic (g)          | 0.7  |
| N-[Tris (hydroxymethyl) methyl]-2 (g)      | 2.7  |
| Sodium acetate trihydrate (g)              | 3.1  |
| Purified water (mL)                        | 100  |
| pH                                         | 7.1  |
| Osmolality (mOsm/kg)                       | 310  |

96

#### 97 **2.4. Motility characteristics**

98 Sperm motility and velocity parameters were determined using a computer-assisted sperm  
99 analyzer (CASA). To perform this, semen were diluted (1:10) by PBS buffer. Next, 10  $\mu$ l of  
100 sperm sample was dropped onto a pre-warmed chamber slide (37 °C, Leja 4; Leja Products,  
101 Luzernestraat B.V., Holland). At least five fields containing a minimum of 200 sperm, were  
102 assessed by CASA. Sperm total motility (TM, %), progressive motility (PM, %), average path  
103 velocity (VAP,  $\mu$ m/s), straight linear velocity (VSL,  $\mu$ m/s), curvilinear velocity (VCL,  $\mu$ m/s),  
104 and amplitude of lateral head displacement (ALH,  $\mu$ m) were evaluated [3].

## 105 **2.5. Viability**

106 Sperm viability was evaluated by the eosin-nigrosine method described by Amini, Kohram  
107 (20). A 5  $\mu$ l of sperm and 10  $\mu$ l eosin-nigrosine stains was spread on a slide. To detect sperm  
108 viability, 200 sperm were assessed under a bright-field microscope at 400  $\times$ .

## 109 **2.6. Membrane integrity**

110 Evaluating sperm membrane functionality was performed by Hypoosmotic swelling test  
111 (HOST) [21]. The assay was performed by adding 10  $\mu$ L of diluted semen into eppendorf tubes  
112 containing 100 mL hypoosmotic solution (1.9 mM sodium citrate and 5 mM fructose, 100  
113 mOsm/kg). After incubation at 37  $^{\circ}$ C for 30 min, total of 10  $\mu$ L of the sample was poured on a  
114 microscope slide, and 200 sperm instantly was calculated under phase-contrast microscope at  
115  $\times$ 400 to detect sperm membrane integrity.

## 116 **2.7. Morphology**

117 For the assessment of morphology after thawing, 10  $\mu$ L of sperm were pipetted into tubes  
118 including 1 ml of Hancock solution [22] (150 ml sodium saline solution, 150 ml PBS buffer  
119 solution and 62.5 ml formalin (37%)). To detect sperm total abnormality, about 200 sperm were  
120 counted by phase-contrast microscope at  $\times$ 1000.

## 121 **2.8. Malondialdehyde (MDA) levels**

122 MDA levels were assessed by thiobarbituric acid reaction [23]. In brief, 1 mL of sperm was  
123 mixed with 1 ml of cold trichloroacetic acid (20%) to precipitate protein. subsequently, the  
124 samples were centrifuged (963 $\times$ g for 15 min), and 1 ml of the supernatant was incubated with  
125 tubes containing 1 ml of thiobarbituric acid (0.67%) in a boiling water bath at 100  $^{\circ}$ C for 10 min.

126 After cooling, the absorbance was assessed by a  
127 Instruments Ltd, UK) at 532 nm.

## 128 **2.9. TAC, GPx and SOD assessment**

129 The antioxidant system was examined by assessment of GPx, TAC, and SOD levels [24].  
130 This variable was assessed spectrophotometrically by Randox™ kits (RANDOX Laboratories  
131 Ltd.) and an Olympus AU 400 automatic biochemistry analyzer (Olympus, Tokyo, Japan).

## 132 **2.10. Flow cytometry**

133 Mitochondria activity and apoptosis status were analyzed by FACSCalibur flow cytometer  
134 (Becton Dickinson System, San Jose, CA, USA). The excitation wavelength was 488 nm  
135 supplied by an argon laser. The sperm population was gated using forward and side scatter. The  
136 volume of green (Annexin-V and Rhodamine-123) and red fluorescence were detected  
137 respectively with a FL1 photodetector (530 nm) and FL3 photodetector (610 nm). Next,  $10 \times 10^3$   
138 events were examined for each assay.

### 139 **2.10.1. Apoptosis status**

140 For detection of sperm apoptosis status [25], the sperm samples were washed in calcium  
141 buffer and in next step, adding 10  $\mu$ L Annexin V FITC (AV) was performed. Following  
142 incubating for a minimum of 20 min, 10  $\mu$ L of propidium iodide (PI) was added to sperm  
143 suspension, then incubated for 10 min before flow cytometry. Following flow cytometry, sperm  
144 subpopulations process were classified into four various groups including: (1) viable non-  
145 apoptotic (AV-/PI-); (2) early apoptotic (AV+/PI-); (3) late apoptotic (AV+/PI-); and (4) necrotic  
146 (AV-/PI-) cells (Fig. 1). The late apoptotic and necrotic sperm were classified as dead sperm.

### 147 **2.10.2. Mitochondrial activity**

148 Mitochondrial activity was assessed by Rhodamine 123 (R123) and PI staining [26]. In brief,  
149 5 microliters of R123 solution (0.01 mg/ml) and PI were added to 250  $\mu$ l of diluted semen  
150 sample and, then incubated in dark place for 20 min. At last, the percentage of sperm  
151 mitochondrial activity (positive signal for Rh123 and negative signal for PI) was assessed by  
152 flow cytometer (Fig. 2).

### 153 2.11. RNA extraction and real-time polymerase chain reaction

154 Primers were designed using Primer3Plus online software on the basis of GenBank sequence of  
155 target genes and are presented in Table 2. The specificity of the primers was checked by a  
156 BLAST analysis of the National Center for Biotechnology information's database. At the  
157 meantime, GAPDH was amplified as an endogenous control gene.

#### 158 Table 2

159 Primer sequences used for quantitative real-time polymerase chain reaction

| Gene      | Primer sequence (5'-3')    | Product size (bp) | Accession no. |
|-----------|----------------------------|-------------------|---------------|
| GAPDH     | F: ATCACAGCCACACAGAAGACG   | 120               | NM_204305.1   |
|           | R: GACTTTCCTCCACAGCCTTAGC  |                   |               |
| CASPASE 3 | F: AACCAGCCTTTTCAGAGGTGAC  | 119               | NM_204725.1   |
|           | R: CTGGTCCACTGTCTGCTTCAATA |                   |               |
| BCL-2     | F: AACATTGCCACCTGGATGAC    | 118               | NM_205339.2   |

160  
161 Total RNA was extracted from sperm samples using Trizol reagent (Invitrogen, Carlsbad, CA,  
162 USA) following the method provided by the manufacturer and quantified using ND-1000  
163 spectrophotometer (NanoDrop Technologies, Wilmington, DE, USA). RNA was transcribed into  
164 complementary DNA with the reverse transcription reagent kit (REVERTA-L RT reagents kit;  
165 code: K3-4-100-CE) and a thermal cycler according to manufacturer's instructions. The RT



166 reaction was conducted in 20 mL of reaction mixture at 37 °C for 15 minutes and then stored at ≤  
167 -20 °C.

168 All polymerase chain reactions (PCRs) were carried out in ABI StepOnePlus Real-Time PCR  
169 Systems (Applied Biosystems, USA) using the RealQ Plus 2x Master Mix Green Kit (Ampliqon,  
170 code: A325402) following manufacturer's instructions. As a whole, the reaction was performed  
171 at 95 °C for 15 min, followed by 40 cycles of denaturing, and annealing and elongating (95 °C  
172 for 15 seconds, 61 °C for 20 seconds and 72 °C for 30 seconds, respectively). The dissociation  
173 curves of PCR products were achieved by a following cycle of 95 °C for 15 seconds, 60 °C for 1  
174 min and 95 °C for 15 seconds, and reaction specificity was defined when there was only one  
175 specific peak in the dissociation curve. The R<sup>2</sup> values for all standard curves generated ranged  
176 0.999, and PCR efficiencies was ≥95%. The quantitative PCR data were analysed using the 2<sup>-ΔΔCt</sup>  
177 method (Livak and Schmittgen 2001).

## 178 **2.12. Artificial insemination**

179 Reproductive performance of post-thawed sperm was assessed by artificial insemination [3].  
180 A total of 30 Ross broiler breeder hens were caged (10 hens in each group) and fed a standard  
181 diet. The straws from each treatment were thawed and inseminated with a dose of 100 × 10<sup>6</sup>  
182 sperm. Eggs were collected for five days after the last artificial insemination. The eggs were  
183 incubated in a commercial incubator. On day 7 of incubation, fertility (by candling the eggs) and  
184 hatchability (the percentage of hatched eggs per fertile eggs) were evaluated for each treatment.

## 185 **2.13. Statistical analysis**

186 Data obtained from post-thawing quality were analyzed by PROC GLM SAS 9.1 (version  
187 9.1, 2002, USA). Effects of supplemented antioxidant on fertility and hatchability were analyzed

188 using GENMOD procedure. The results are expressed as the mean±SEM. The Turkey's test was  
 189 performed to compare treatments. Significance level was adjusted to  $p < 0.05$ .

190

### 191 3. Results

192 Motility and velocity variables of frozen-thawed of rooster sperm supplemented with  
 193 different levels of crocin and naringenin are depicted in Table 3. C1 and N100 resulted in higher  
 194 ( $P < 0.05$ ) total motility and progressive motility compared to the control group. The analysis did  
 195 not reveal any significant differences among different concentrations of crocin and naringenin on  
 196 the VCL, VAP, VSL, ALH, LIN, BCF and STR parameters.

#### 197 Table 3

198 Effect of different levels of crocin and naringenin on motility parameters of rooster thawed semen,  
 199 analyzed by CASA ( $n = 5$ ).

| Antioxidant | TM (%)              | PM (%)              | VSL ( $\mu\text{m/s}$ ) | VAP ( $\mu\text{m/s}$ ) | VCL ( $\mu\text{m/s}$ ) | LIN (%) | STR (%) | ALH ( $\mu\text{m}$ ) | BCF (Hz) |
|-------------|---------------------|---------------------|-------------------------|-------------------------|-------------------------|---------|---------|-----------------------|----------|
| Control     | 61.06 <sup>c</sup>  | 22.03 <sup>b</sup>  | 16.37                   | 29.94                   | 52.47                   | 32.88   | 54.65   | 5.25                  | 15.33    |
| C0.5        | 65.19 <sup>bc</sup> | 26.66 <sup>ab</sup> | 17.42                   | 31.74                   | 56.22                   | 31.32   | 54.80   | 4.94                  | 15.72    |
| C1          | 74.43 <sup>a</sup>  | 30.88 <sup>a</sup>  | 18.78                   | 33.13                   | 57.72                   | 33.03   | 57.88   | 4.58                  | 16.10    |
| C1.5        | 61.34 <sup>c</sup>  | 25.10 <sup>ab</sup> | 16.76                   | 30.42                   | 54.08                   | 31.28   | 55.86   | 4.90                  | 15.17    |
| N50         | 64.13 <sup>bc</sup> | 24.58 <sup>ab</sup> | 17.30                   | 31.24                   | 53.23                   | 32.14   | 56.51   | 5.28                  | 15.59    |
| N100        | 71.21 <sup>ab</sup> | 28.46 <sup>a</sup>  | 18.68                   | 32.01                   | 57.13                   | 33.02   | 59.25   | 4.78                  | 16.06    |
| N150        | 60.94 <sup>c</sup>  | 21.61 <sup>b</sup>  | 16.54                   | 30.33                   | 51.08                   | 31.26   | 55.59   | 5.04                  | 15.49    |
| SEM         | 1.78                | 1.79                | 1.63                    | 1.96                    | 2.55                    | 3.68    | 6.07    | 0.26                  | 1.77     |

200

201 MOT: Total motility (MOT, %); PROG: Progressive motility; VSL: straight-line velocity; VAP: Average path  
 202 velocity; VCL: curvilinear velocity; LIN: Linearity; STR: Straightness; ALH: Mean amplitude of the lateral head  
 203 displacement; BCF: Mean of the beat cross frequency. Different superscripts within the same column indicate  
 204 significant differences among groups ( $p < 0.05$ ).

205 Beltsville extender without antioxidant (control), C0.5 (Beltsville extender with 0.5 mM crocin), C1 (Beltsville  
 206 extender with 1 mM crocin), C1.5 (Beltsville extender with 1.5 mM crocin), N50 (Beltsville extender with 50  $\mu\text{M}$   
 207 naringenin), N100 (Beltsville extender with 100  $\mu\text{M}$  naringenin), N150 (Beltsville extender with 150  $\mu\text{M}$   
 208 naringenin)

209

210 The findings of the current research revealed that plasma membrane integrity in C1 and N100  
 211 were significantly higher compared to control group (Fig. 3). Fig. 4 summarizes the data on

212 mitochondrial activity. The findings of this test revealed that the percentage of mitochondria  
213 activity was higher in the C1 and N100 groups. The results show that different levels of crocin  
214 and naringenin does not seem to impact the abnormal forms after freeze-thawing (Fig. 5).  
215 Superior results were observed for viable sperm in C1 and N100 compared with control group  
216 (Fig. 6).

217 Table 4 details the data on apoptosis status analysis. The most remarkable result is that the  
218 percentage of live sperm was emerged to be higher in 1 mM crocin and 100  $\mu$ M naringenin in  
219 comparison with the control. Apoptotic spermatozoa were significantly reduced in the C1 and  
220 N100 levels when compared to control group.

#### 221 **Table 4**

222 Effect of different levels of crocin and naringenin on viable, apoptotic and dead sperm in rooster thawed  
223 semen, as assessed by flow cytometry ( $n = 5$ ).

| Antioxidant | Live (%)           | Early apoptosis (%) | Dead (%) |
|-------------|--------------------|---------------------|----------|
| Control     | 56.95 <sup>b</sup> | 25.28 <sup>a</sup>  | 17.76    |
| C0.5        | 60.88 <sup>b</sup> | 21.88 <sup>ab</sup> | 17.23    |
| C1          | 71.46 <sup>a</sup> | 15.30 <sup>b</sup>  | 13.23    |
| C1.5        | 57.31 <sup>b</sup> | 24.47 <sup>a</sup>  | 18.20    |
| N50         | 59.73 <sup>b</sup> | 22.81 <sup>ab</sup> | 17.45    |
| N100        | 70.86 <sup>a</sup> | 15.40 <sup>b</sup>  | 13.72    |
| N150        | 57.24 <sup>b</sup> | 24.78 <sup>a</sup>  | 17.97    |
| SEM         | 1.39               | 1.81                | 1.87     |

224 Different superscripts within the same column indicate significant differences among groups ( $p < 0.05$ ). Beltsville  
225 extender without antioxidant (control), C0.5 (Beltsville extender with 0.5 mM crocin), C1 (Beltsville extender with  
226 1 mM crocin), C1.5 (Beltsville extender with 1.5 mM crocin), N50 (Beltsville extender with 50  $\mu$ M naringenin),  
227 N100 (Beltsville extender with 100  $\mu$ M naringenin), N150 (Beltsville extender with 150  $\mu$ M naringenin)  
228  
229

230 Table 5 reports the data on effects of various levels of crocin and naringenin on the oxidative  
231 parameters status of rooster sperm following freeze-thawing. We can note from the table that the  
232 highest values for TAC activity were achieved in the C1 and N100 groups compared with control

233 group. Also, malondialdehyde was significantly ( $P < 0.05$ ) lower in C1 and N100 than the  
234 control. The analysis did not reveal any significant differences for SOD and GPx parameters.

235

236 **Table 5**

237 Effect of different levels of crocin and naringenin on malondialdehyde concentration (MDA), glutathione  
238 peroxidase (GPx) and superoxide dismutase (SOD) activities and total antioxidant capacity (TAC) of  
239 rooster thawed semen ( $n = 5$ ).

| Antioxidant | MDA<br>(nmol/mL)   | GPx<br>(U/mg protein) | SOD<br>(U/mg) | TAC<br>(mmol/l)     |
|-------------|--------------------|-----------------------|---------------|---------------------|
| Control     | 4.26 <sup>a</sup>  | 54.00                 | 107.70        | 1.13 <sup>bc</sup>  |
| C0.5        | 2.91 <sup>c</sup>  | 60.70                 | 118.25        | 1.70 <sup>ab</sup>  |
| C1          | 1.83 <sup>d</sup>  | 63.20                 | 124.65        | 1.85 <sup>a</sup>   |
| C1.5        | 3.81 <sup>ab</sup> | 55.20                 | 109.38        | 1.26 <sup>c</sup>   |
| N50         | 3.12 <sup>bc</sup> | 57.85                 | 117.87        | 1.66 <sup>abc</sup> |
| N100        | 1.90 <sup>d</sup>  | 62.71                 | 123.92        | 1.88 <sup>a</sup>   |
| N150        | 4.01 <sup>a</sup>  | 53.61                 | 108.37        | 1.18 <sup>c</sup>   |
| SEM         | 0.19               | 2.14                  | 6.33          | 0.13                |

240 Different superscripts within the same column indicate significant differences among groups ( $P < 0.05$ ). Beltsville  
241 extender without antioxidant (control), C0.5 (Beltsville extender with 0.5 mM crocin), C1 (Beltsville extender with  
242 1 mM crocin), C1.5 (Beltsville extender with 1.5 mM crocin), N50 (Beltsville extender with 50  $\mu$ M naringenin),  
243 N100 (Beltsville extender with 100  $\mu$ M naringenin), N150 (Beltsville extender with 150  $\mu$ M naringenin)

244

245

246 The results of mRNA expressions of BCL-2 and CASPASE 3 are showed in Fig.7 and Fig. 8.

247 The mRNA expressions of BCL-2 in the C1 and N100 group were significantly higher than that  
248 in other treatments. The expression of CASPASES 3 was significantly reduced in C1 and N100  
249 group ( $P < 0.05$ ) when compared to control group.

250 The findings of the fertility trial (Table 6) revealed a significantly higher ( $P < 0.05$ ) percentage  
251 of fertility and hatching rate in C1 and N100 compared to the control group.

252

253

254 **Table 6**

255 Effect of crocin and naringenin on fertility and hatchability rates of rooster semen after freeze-thawing

| Antioxidant            | Fertility (%)   | Hatchability of fertile egg (%) |
|------------------------|-----------------|---------------------------------|
| Control                | 36 <sup>b</sup> | 47.37 <sup>a</sup>              |
| Naringenin 100 $\mu$ M | 54 <sup>a</sup> | 74.07 <sup>a</sup>              |
| Crocin 1 mM            | 52 <sup>a</sup> | 73.08 <sup>a</sup>              |

256 Different superscripts letters within column are significantly different ( $P < 0.05$ ).

257

258

259 **4. Discussion**

260 Studies evaluating the efficacy of antioxidants to prevent damage during sperm  
261 cryopreservation usually cause contradictory results. Some experiments have reported a  
262 protective effect against cryo-related oxidative damages [27]. However, other studies could not  
263 show significant effects; some even led to impaired sperm function [10, 28, 29]. In this context,  
264 some points must be taken into consideration when performing an antioxidant treatment. An  
265 important point is that each ROS is deactivated by a specific antioxidant system [30, 31];  
266 therefore, if antioxidant therapy is chosen at random, this treatment will not be effective if it is  
267 not directed to ROS, which is the main cause of oxidative damage [32]. The protective effect of  
268 natural antioxidants on oxidative stress in avian species has been considered in various studies.  
269 However, such antioxidants are generally present in little amounts in semen for neutralizing the  
270 oxidative stress which occurs during in vitro sperm conservation [33]. It is demonstrated that  
271 defeating oxidative stress can be supplied by adding a variety of antioxidants to the bird sperm  
272 [21, 23, 34]. Some characteristics of crocin and naringenin make them highly effective  
273 supplements to be utilized as additives for rooster sperm cryopreservation medium. The  
274 hypothesis in the present study was that crocin and naringenin, as a supplement in freezing  
275 extenders, could be effective in eliminating oxidative damage caused by freezing.

276 It was observed in our study that the addition of 1 mM of crocin and 100  $\mu$ M naringenin  
277 during preparation of the sperm had a beneficial effect on the total and progressive motility of  
278 sperm in comparison with the control group, while no effect was observed on the other motility  
279 parameters. The favorable effect of saffron and its bioactive component, crocin, on some  
280 parameters such as motility and viability has been demonstrated in deer, mice and humans [35-  
281 37]. It is demonstrated that in stressful conditions, naringenin has the ability to chelate irons and  
282 decrease ROS production. Interestingly, it is related to the fact that naringenin has 5-hydroxy and  
283 4-carbonyl groups in the C-ring which plays a role in ROS scavenging, Cu, and Fe ions  
284 interaction [38, 39]. Therefore, adding naringenin to the cryopreservation medium can decrease  
285 the stress caused by freezing, consequently can increase motility which was observed in our  
286 study.

287 It is shown that crocin can reduce the levels of superoxide anion and hydrogen peroxide. The  
288 supplementation of crocin in the cryopreservation medium showed to be advantageous for the  
289 sperm in terms of viability at the C1 group. Carotenoids show stabilizing effect on sperm  
290 conservation by interaction with the superoxide anion [40]. Furthermore, crocin enhances the  
291 activity of particular intracellular detoxifying enzymes or effects the fluidity of the membrane,  
292 which influences its permeability to oxygen and further molecules [41].

293 Our previous studies has adopted an approach in the study of the associations between sperm  
294 variables and MDA levels [42]. The correlation between MDA content of the sperm and the  
295 fertilization capacity is worth mentioning [43]. Malondialdehyde levels in semen are inversely  
296 proportional to the function of sperm [32, 44]. These data were again confirmed in the present  
297 investigation, in which the MDA level was evaluated because it is known as a gold marker for  
298 oxidative stress, a phenomenon extremely associated to the antioxidant system. In line with our

299 study, Sapanidou, Taitzoglou (17), showed that MDA production decreased while supplementing  
300 1 mM crocin in sperm.

301 According to our results, naringenin 100  $\mu$ M reduced the MDA level. A satisfactory  
302 explanation for this may be related to its structure-activity. Naringenin can give hydrogen to  
303 ROS that allows the acquisition of a stable composition, allowing the elimination of these free  
304 radicals. Another interesting reason is the existence of phenolic rings in naringenin which act as  
305 electron barriers to remove superoxide anions characteristic known as free radicals [45].

306 In the light of the data, it is clearly essential to comprehend what cellular factors normally  
307 serve as causes for free radical production by mitochondria of sperm. It is demonstrated that the  
308 generation of mitochondrial ROS raises when the membrane potential collapses  
309 pharmacologically [46]. Carotenoids have a recognized protective effect in the mitochondria and  
310 the crocin itself has been reported a mitochondrial protector [47]. Therefore, it was predictable  
311 that C1 and N100 increased mitochondrial activity after thawing. The axosomas and dense fibers  
312 associated with the central part of the sperm cells are covered by mitochondria, the organs which  
313 produce energy from ATP that are involved in sperm motility [48]. It is obvious that  
314 cryopreservation results in a reduction in sperm motility, morphological functional integrity and  
315 mitochondrial membrane potential by inducing axonemal damage [49-51]. Sperm motility is the  
316 main key for the substantial penetration of cumulus cells and the zona pellucida of the ovum  
317 [48]. A conspicuous correlation is confirmed between sperm motility and mitochondrial activity  
318 [3]. Therefore, in the present study, supplementation of sperm extender with crocin 1mM and  
319 100  $\mu$ M naringenin before cryopreservation increased membrane integrity and mitochondrial  
320 activity leading to improving sperm motility.

321 Mitochondrial dysfunction is shown to be a critical modulator of ROS production and  
322 consequently onset of apoptosis. An interesting result was found for crocin 1mM and 100  $\mu$ M  
323 naringenin in reducing early apoptosis. This is in complete agreement with Sapanidou et al. who  
324 reported that PS externalization decreased in the group containing 1mM crocin [17]. Our results  
325 do not support the observations by Mata-Campuzano, Alvarez-Rodriguez (52), who noted that  
326 crocin did not affect apoptotic ratio in ram sperm following cryopreservation. It is indicated that  
327 various apoptogenic proteins containing Cyt-c, AIF and Endo-G are released through pores  
328 generated by the mitochondrial membrane potential and consequently inhibiting the release of  
329 different types of apoptogenic factors from mitochondria. Thereby, the expressions of caspase-3  
330 and bcl-2 which were regulated in sperm cells owing to the release of apoptogenic factors from  
331 mitochondrial pores was inhibited in naringenin 100 and crocin 1. As explained above,  
332 naringenin is effective in conserving the mitochondrial membrane by preventing the excessive  
333 production of ROS, consequently, inhibiting the release of several apoptogenic factors from the  
334 mitochondria [53]. Also it is shown that naringenin restricts translocation of AIF and Endo-G to  
335 the nucleus by restoring mitochondrial membrane potential that prevents DNA damage and,  
336 finally inhibits cell damage [54]. It is an appreciable reason for preventing apoptosis by  
337 naringenin after freeze thawing. Naringenin can initiate the mitochondrial-mediated apoptosis  
338 pathway as revealed by an enhanced ratio of (pro-apoptotic) Bax/(anti-apoptotic) Bcl2 genes,  
339 therefore results in release of cytochrome C and consequent activation of Caspase-3 [55].  
340 Caspase-3 is known as the critical effector caspase responsible for the execution of apoptotic cell  
341 death by cleaving numerous cellular substrates [56].

342 The results of this study show that the enhancement in fertility result using thawed sperm  
343 stored in C1 and N100 was consistent with the other sperm functional parameters. The freezing



344 and thawing process dramatically reduces the fertilization capacity of the rooster sperm.  
345 Likewise, a relatively large number of live sperm is required inside the sperm storage tubes  
346 (SST) to determine fertilization after inseminations [57]. The semen parameters related to  
347 fertility such as sperm motility, vitality and progressive motility can influence the penetration of  
348 cervical mucus. So, the strategies that enhance the sperm viability and motility will ensure sperm  
349 journey in the hen reproductive tract to attain SST and then the fertilization position. Also,  
350 enhancement of cellular variables by improving sperm antioxidant system and mitochondria  
351 activity will increase sperm function during passage in the reproductive tract [25]. Therefore, it  
352 appears that higher sperm quality in a group of C1 and N100 showed greater hatching among  
353 treatment groups by preserving more alive sperm in SST and influencing fertility in the current  
354 trial.

355 The present study showed that 1 mM crocin and 100  $\mu$ M naringenin could beneficially affect  
356 a variety of semen quality in Ross 308 breeder roosters. Particularly, 1 mM crocin and 100  $\mu$ M  
357 naringenin could protect the sperm against excessive ROS generation by reducing the pro-  
358 apoptotic (CASPASE 3) and increasing anti-apoptotic (Bcl-2) apoptosis genes. Also, enrichment  
359 of semen extender with 1 mM crocin and 100  $\mu$ M naringenin improved fertilizing capacity of  
360 rooster sperm.

361

## 362 **References**

- 363 1. Polge C. Functional survival of fowl spermatozoa after freezing at  $-79^{\circ}$  C. *Nature*.  
364 1951;167(4258):949.
- 365 2. Zhandi M, Ansari M, Roknabadi P, Zare Shahneh A, Sharafi M. Orally administered  
366 Chrysin improves post-thawed sperm quality and fertility of rooster. *Reproduction in domestic*

- 367 animals = Zuchthygiene. 2017;52(6):1004-10. Epub 2017/07/12. doi: 10.1111/rda.13014.  
368 PubMed PMID: 28695606.
- 369 3. Mehdipour M, Daghigh Kia H, Moghaddam G, Hamishehkar H. Effect of egg yolk  
370 plasma and soybean lecithin on rooster frozen-thawed sperm quality and fertility.  
371 Theriogenology. 2018;116:89-94. Epub 2018/05/23. doi: 10.1016/j.theriogenology.2018.05.013.  
372 PubMed PMID: 29787941.
- 373 4. Masoudi R, Sharafi M, Zare Shahneh A, Kohram H, Nejati-Amiri E, Karimi H, et al.  
374 Supplementation of extender with coenzyme Q10 improves the function and fertility potential of  
375 rooster spermatozoa after cryopreservation. Animal reproduction science. 2018;198:193-201.  
376 Epub 2018/10/10. doi: 10.1016/j.anireprosci.2018.09.019. PubMed PMID: 30297204.
- 377 5. Askarianzadeh Z, Sharafi M, Karimi Torshizi MA. Sperm quality characteristics and  
378 fertilization capacity after cryopreservation of rooster semen in extender exposed to a magnetic  
379 field. Animal reproduction science. 2018. Epub 2018/09/18. doi:  
380 10.1016/j.anireprosci.2018.08.043. PubMed PMID: 30220606.
- 381 6. Partyka A, Nizanski W, Bajzert J, Lukaszewicz E, Ochota M. The effect of cysteine and  
382 superoxide dismutase on the quality of post-thawed chicken sperm. Cryobiology. 2013. doi:  
383 10.1016/j.cryobiol.2013.06.002. PubMed PMID: 23770516.
- 384 7. Sanocka D, Kurpisz M. Reactive oxygen species and sperm cells. Reproductive biology  
385 and endocrinology : RB&E. 2004;2(12):1-7.
- 386 8. Lotfi S, Mehri M, Sharafi M, Masoudi R. Hyaluronic acid improves frozen-thawed sperm  
387 quality and fertility potential in rooster. Animal reproduction science. 2017;184:204-10. Epub  
388 2017/08/07. doi: 10.1016/j.anireprosci.2017.07.018. PubMed PMID: 28781155.

- 389 9. Nandi S, Whyte J, Taylor L, Sherman A, Nair V, Kaiser P, et al. Cryopreservation of  
390 specialized chicken lines using cultured primordial germ cells. *Poultry science*. 2016. doi:  
391 10.3382/ps/pew133. PubMed PMID: 27099306.
- 392 10. Shojaeian K, Nouri H, Kohram H. Does MnTBAP ameliorate DNA fragmentation and in  
393 vivo fertility of frozen-thawed Arabian stallion sperm? *Theriogenology*. 2018;108:16-21. Epub  
394 2017/11/29. doi: 10.1016/j.theriogenology.2017.11.019. PubMed PMID: 29182942.
- 395 11. Akain PP, Bucak MN, Gungor Ş, Baspinar N, Çoyan K, Dursun Ş, et al. Influence of  
396 lycopene and cysteamine on sperm and oxidative stress parameters during liquid storage of ram  
397 semen at 5° C. *Small Ruminant Research*. 2016;137:117-23.
- 398 12. Sariozkan S, Tuncer PB, Buyukleblebici S, Bucak MN, Canturk F, Eken A. Antioxidative  
399 effects of cysteamine, hyaluronan and fetuin on post-thaw semen quality, DNA integrity and  
400 oxidative stress parameters in the Brown Swiss bull. *Andrologia*. 2015;47(2):138-47. doi:  
401 10.1111/and.12236. PubMed PMID: 24499020.
- 402 13. Bucak MN, Keskin N, Taspinar M, Coyan K, Baspinar N, Cenariu MC, et al. Raffinose  
403 and hypotaurine improve the post-thawed Merino ram sperm parameters. *Cryobiology*.  
404 2013;67(1):34-9. doi: 10.1016/j.cryobiol.2013.04.007. PubMed PMID: 23644017.
- 405 14. Yu J, Wang L, Walzem RL, Miller EG, Pike LM, Patil BS. Antioxidant activity of citrus  
406 limonoids, flavonoids, and coumarins. *J Agric Food Chem*. 2005;53(6):2009-14.
- 407 15. Mershiba SD, Dassprakash MV, Saraswathy SD. Protective effect of naringenin on  
408 hepatic and renal dysfunction and oxidative stress in arsenic intoxicated rats. *Mol Biol Rep*.  
409 2013;40(5):3681-91.
- 410 16. Wang J, Yang Z, Lin L, Zhao Z, Liu Z, Liu X. Protective effect of naringenin against  
411 lead-induced oxidative stress in rats. *Biol Trace Elem Res*. 2012;146(3):354-9.

- 412 17. Sapanidou V, Taitzoglou I, Tsakmakidis I, Kourtzelis I, Fletouris D, Theodoridis A, et al.  
413 Antioxidant effect of crocin on bovine sperm quality and in vitro fertilization. *Theriogenology*.  
414 2015;84(8):1273-82. doi: 10.1016/j.theriogenology.2015.07.005. PubMed PMID: 26253435.
- 415 18. Domínguez-Rebolledo ÁE, Fernández-Santos MR, Bisbal A, Ros-Santaella JL, Ramón  
416 M, Carmona M, et al. Improving the effect of incubation and oxidative stress on thawed  
417 spermatozoa from red deer by using different antioxidant treatments. *Reproduction, Fertility and*  
418 *Development*. 2010;22(5):856-70.
- 419 19. Burrows W, Quinn JJPS. The collection of spermatozoa from the domestic fowl and  
420 turkey. 1937;16(1):19-24.
- 421 20. Amini MR, Kohram H, Zare Shahaneh A, Zhandi M, Sharideh H, Nabi MM. The effects  
422 of different levels of vitamin E and vitamin C in modified Beltsville extender on rooster post-  
423 thawed sperm quality. *Cell and tissue banking*. 2015;16(4):587-92. Epub 2015/03/18. doi:  
424 10.1007/s10561-015-9506-9. PubMed PMID: 25779925.
- 425 21. Fattah A, Sharafi M, Masoudi R, Shahverdi A, Esmaeili V, Najafi A. l-Carnitine in  
426 rooster semen cryopreservation: Flow cytometric, biochemical and motion findings for frozen-  
427 thawed sperm. *Cryobiology*. 2017;74:148-53. doi: 10.1016/j.cryobiol.2016.10.009. PubMed  
428 PMID: 27983947.
- 429 22. Najafi A, Zhandi M, Towhidi A, Sharafi M, Akbari Sharif A, Khodaei Motlagh M, et al.  
430 Trehalose and glycerol have a dose-dependent synergistic effect on the post-thawing quality of  
431 ram semen cryopreserved in a soybean lecithin-based extender. *Cryobiology*. 2013;66(3):275-82.  
432 doi: 10.1016/j.cryobiol.2013.03.002. PubMed PMID: 23500077.

- 433 23. Najafi A, Kia HD, Hamishehkar H, Moghaddam G, Alijani S. Effect of resveratrol-  
434 loaded nanostructured lipid carriers supplementation in cryopreservation medium on post-thawed  
435 sperm quality and fertility of roosters. *Animal reproduction science*. 2019;201:32-40.
- 436 24. Najafi A, Taheri RA, Mehdipour M, Martínez-Pastor F, Rouhollahi AA, Nourani MR.  
437 Improvement of post-thawed sperm quality in broiler breeder roosters by ellagic acid-loaded  
438 liposomes. *Poultry science*. 2018.
- 439 25. Feyzi S, Sharafi M, Rahimi S. Stress preconditioning of rooster semen before  
440 cryopreservation improves fertility potential of thawed sperm. *Poultry science*. 2018;97(7):2582-  
441 90. Epub 2018/03/28. doi: 10.3382/ps/pey067. PubMed PMID: 29584912.
- 442 26. Najafi A, Taheri RA, Mehdipour M, Farnoosh G, Martinez-Pastor F. Lycopene-loaded  
443 nanoliposomes improve the performance of a modified Beltsville extender broiler breeder  
444 roosters. *Animal reproduction science*. 2018. Epub 2018/06/09. doi:  
445 10.1016/j.anireprosci.2018.05.021. PubMed PMID: 29880233.
- 446 27. Carneiro JAM, Canisso IF, Bandeira RS, Scheeren VFC, Freitas-Dell'Aqua CP,  
447 Alvarenga MA, et al. Effects of coenzyme Q10 on semen cryopreservation of stallions classified  
448 as having good or bad semen freezing ability. *Animal reproduction science*. 2018;192:107-18.  
449 Epub 2018/03/06. doi: 10.1016/j.anireprosci.2018.02.020. PubMed PMID: 29502896.
- 450 28. Masoudi R, Sharafi M, Shahneh AZ, Khodaei-Motlagh M. Effects of reduced glutathione  
451 on the quality of rooster sperm during cryopreservation. *Theriogenology*. 2019.
- 452 29. Masoudi R, Sharafi M, Azadi LP. Improvement of rooster semen quality using coenzyme  
453 Q10 during cooling storage in the Lake extender. *Cryobiology*. 2019. Epub 2019/03/13. doi:  
454 10.1016/j.cryobiol.2019.03.003. PubMed PMID: 30857955.

- 455 30. Homa ST, Vessey W, Perez-Miranda A, Riyait T, Agarwal A. Reactive Oxygen Species  
456 (ROS) in human semen: determination of a reference range. *Journal of assisted reproduction and*  
457 *genetics*. 2015;32(5):757-64. doi: 10.1007/s10815-015-0454-x. PubMed PMID: 25749739;  
458 PubMed Central PMCID: PMC4429439.
- 459 31. Agarwal A, Mulgund A, Alshahrani S, Assidi M, Abuzenadah AM, Sharma R, et al.  
460 Reactive oxygen species and sperm DNA damage in infertile men presenting with low level  
461 leukocytospermia. *Reproductive biology and endocrinology: RB&E*. 2014;12:126. doi:  
462 10.1186/1477-7827-12-126. PubMed PMID: 25527074; PubMed Central PMCID:  
463 PMC4292986.
- 464 32. Aitken RJ, Jones KT, Robertson SA. Reactive oxygen species and sperm function--in  
465 sickness and in health. *Journal of andrology*. 2012;33(6):1096-106. doi:  
466 10.2164/jandrol.112.016535. PubMed PMID: 22879525.
- 467 33. Partyka A, Strojceki M, Nizanski W. Cyclodextrins or cholesterol-loaded-cyclodextrins?  
468 A better choice for improved cryosurvival of chicken spermatozoa. *Animal reproduction science*.  
469 2018;193:235-44. Epub 2018/04/28. doi: 10.1016/j.anireprosci.2018.04.076. PubMed PMID:  
470 29699918.
- 471 34. Najafi D, Taheri RA, Najafi A, Rouhollahi AA, Alvarez-Rodriguez M. Effect of *Achillea*  
472 *millefolium*-loaded nanophytosome in the post-thawing sperm quality and oxidative status of  
473 rooster semen. *Cryobiology*. 2018;82:37-42. Epub 2018/04/22. doi:  
474 10.1016/j.cryobiol.2018.04.011. PubMed PMID: 29678467.
- 475 35. Abdullaev FI. Cancer chemopreventive and tumoricidal properties of saffron (*Crocus*  
476 *sativus* L.). *Exp Biol Med*. 2002;227(1):20-5.

- 477 36. Tsantarliotou MP, Poutahidis T, Markala D, Kazakos G, Sapanidou V, Lavrentiadou S, et  
478 al. Crocetin administration ameliorates endotoxin-induced disseminated intravascular  
479 coagulation in rabbits. *Blood Coagul Fibrinolysis*. 2013;24(3):305-10.
- 480 37. Mardani M, Vaez A, Razavi S. Effect of saffron on rat sperm chromatin integrity. *Iranian*  
481 *journal of reproductive medicine*. 2014;12(5):343.
- 482 38. Mostafa HE, Abd El-Baset SA, Kattaia AA, Zidan RA, Al Sadek MM. Efficacy of  
483 naringenin against permethrin-induced testicular toxicity in rats. *Int J Exp Pathol*. 2016. doi:  
484 10.1111/iep.12168. PubMed PMID: 26867500.
- 485 39. Adana MY, Akang EN, Peter AI, Jegede AI, Naidu ECS, Tiloke C, et al. Naringenin  
486 attenuates highly active antiretroviral therapy-induced sperm DNA fragmentations and testicular  
487 toxicity in Sprague-Dawley rats. *Andrology*. 2018;6(1):166-75. Epub 2017/11/28. doi:  
488 10.1111/andr.12439. PubMed PMID: 29179260.
- 489 40. Heidary M, Vahhabi S, Nejadi JR, Delfan B, Birjandi M, Kaviani H, et al. Effect of  
490 saffron on semen parameters of infertile men. *Urology Journal*. 2008;5(4):255-9.
- 491 41. Assimopoulou A, Sinakos Z, Papageorgiou V. Radical scavenging activity of *Crocus*  
492 *sativus* L. extract and its bioactive constituents. *Phytotherapy Research: An International Journal*  
493 *Devoted to Pharmacological and Toxicological Evaluation of Natural Product Derivatives*.  
494 2005;19(11):997-1000.
- 495 42. Najafi A, Daghigh Kia H, Mehdipour M, Shamsollahi M, Miller DJ. Does fennel extract  
496 ameliorate oxidative stress frozen-thawed ram sperm? *Cryobiology*. 2019;87:47-51. Epub  
497 2019/03/05. doi: 10.1016/j.cryobiol.2019.02.006. PubMed PMID: 30831077.
- 498 43. Tuncer PB, Buyukleblebici S, Eken A, Tasdemir U, Durmaz E, Buyukleblebici O, et al.  
499 Comparison of cryoprotective effects of lycopene and cysteamine in different cryoprotectants on

- 500 bull semen and fertility results. *Reproduction in domestic animals = Zuchthygiene.*  
501 2014;49(5):746-52. doi: 10.1111/rda.12359. PubMed PMID: 24942070.
- 502 44. Gharagozloo P, Aitken RJ. The role of sperm oxidative stress in male infertility and the  
503 significance of oral antioxidant therapy. *Human reproduction.* 2011;26(7):1628-40. doi:  
504 10.1093/humrep/der132. PubMed PMID: 21546386.
- 505 45. Yen F-L, Wu T-H, Lin L-T, Cham T-M, Lin C-C. Naringenin-loaded nanoparticles  
506 improve the physicochemical properties and the hepatoprotective effects of naringenin in orally-  
507 administered rats with CCl<sub>4</sub>-induced acute liver failure. *Pharm Res.* 2009;26(4):893-902.
- 508 46. Koppers AJ, De Iuliis GN, Finnie JM, McLaughlin EA, Aitken RJ. Significance of  
509 mitochondrial reactive oxygen species in the generation of oxidative stress in spermatozoa. *The*  
510 *Journal of Clinical Endocrinology & Metabolism.* 2008;93(8):3199-207.
- 511 47. Venkatraman M, Konga D, Peramaiyan R, Ganapathy E, Dhanapal S. Reduction of  
512 mitochondrial oxidative damage and improved mitochondrial efficiency by administration of  
513 crocetin against benzo [a] pyrene induced experimental animals. *Biol Pharm Bull.*  
514 2008;31(9):1639-45.
- 515 48. Garner D, Hafez E. Spermatozoa and seminal plasma. *Reproduction in farm animals.*  
516 2000:96-109.
- 517 49. Sariozkan S, Bucak MN, Tuncer PB, Buyukleblebici S, Eken A, Akay C. Influence of  
518 fetuin and hyaluronan on the post-thaw quality and fertilizing ability of Holstein bull semen.  
519 *Cryobiology.* 2015;71(1):119-24. doi: 10.1016/j.cryobiol.2015.04.011. PubMed PMID:  
520 25962321.
- 521 50. Buyukleblebici S, Tuncer PB, Bucak MN, Eken A, Sariozkan S, Tasdemir U, et al.  
522 Cryopreservation of bull sperm: effects of extender supplemented with different cryoprotectants



523 and antioxidants on sperm motility, antioxidant capacity and fertility results. *Animal*  
524 *reproduction science*. 2014;150(3-4):77-83. doi: 10.1016/j.anireprosci.2014.09.006. PubMed  
525 PMID: 25278438.

526 51. Tuncer PB, Sariozkan S, Bucak MN, Ulutas PA, Akalin PP, Buyukleblebici S, et al.  
527 Effect of glutamine and sugars after bull spermatozoa cryopreservation. *Theriogenology*.  
528 2011;75(8):1459-65. Epub 2011/03/01. doi: 10.1016/j.theriogenology.2010.12.006. PubMed  
529 PMID: 21354604.

530 52. Mata-Campuzano M, Alvarez-Rodriguez M, Alvarez M, Tamayo-Canul J, Anel L, de Paz  
531 P, et al. Post-thawing quality and incubation resilience of cryopreserved ram spermatozoa are  
532 affected by antioxidant supplementation and choice of extender. *Theriogenology*.  
533 2015;83(4):520-8. doi: 10.1016/j.theriogenology.2014.10.018. PubMed PMID: 25499089.

534 53. Kapoor R, Rizvi F, Kakkar P. Naringenin prevents high glucose-induced mitochondria-  
535 mediated apoptosis involving AIF, Endo-G and caspases. *Apoptosis*. 2013;18(1):9-27.

536 54. Kapoor R, Kakkar P. Naringenin accords hepatoprotection from streptozotocin induced  
537 diabetes in vivo by modulating mitochondrial dysfunction and apoptotic signaling cascade.  
538 *Toxicology reports*. 2014;1:569-81.

539 55. Arul D, Subramanian P. Naringenin (citrus flavonone) induces growth inhibition, cell  
540 cycle arrest and apoptosis in human hepatocellular carcinoma cells. *Pathology & Oncology*  
541 *Research*. 2013;19(4):763-70.

542 56. Bakar MFA, Mohamad M, Rahmat A, Burr SA, Fry JR. Cytotoxicity, cell cycle arrest,  
543 and apoptosis in breast cancer cell lines exposed to an extract of the seed kernel of *Mangifera*  
544 *pajang* (bambangan). *Food Chem Toxicol*. 2010;48(6):1688-97.

545 57. Ansari M, Zhandi M, Kohram H, Zaghari M, Sadeghi M, Sharafi M. Improvement of  
546 post-thawed sperm quality and fertility of Arian rooster by oral administration of d-aspartic acid.  
547 Theriogenology. 2017;92:69-74. doi: 10.1016/j.theriogenology.2017.01.014. PubMed PMID:  
548 28237346.

549

bioRxiv preprint doi: <https://doi.org/10.1101/846758>; this version posted November 18, 2019. The copyright holder for this preprint (which was not certified by peer review) is the author/funder, who has granted bioRxiv a license to display the preprint in perpetuity. It is made available under aCC-BY 4.0 International license.

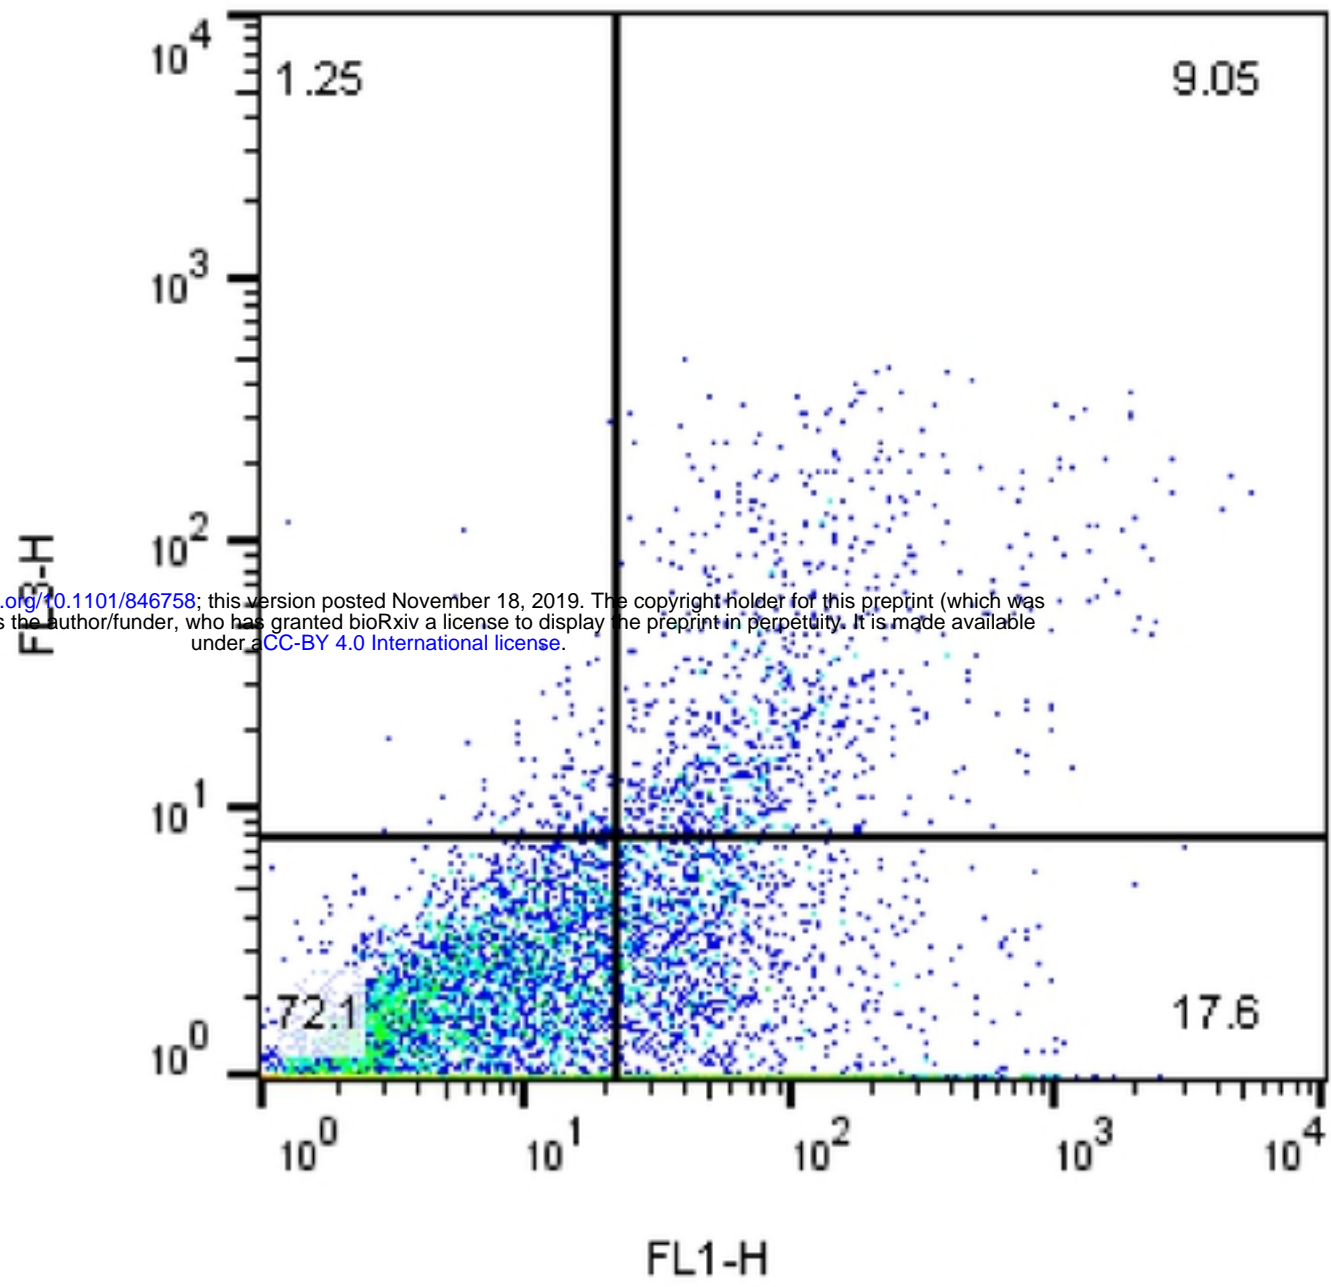

Fig. 1. Annexin V and propidium iodide staining were used to determine the different cell populations.

bioRxiv preprint doi: <https://doi.org/10.1101/846758>; this version posted November 18, 2019. The copyright holder for this preprint (which was not certified by peer review) is the author/funder, who has granted bioRxiv a license to display the preprint in perpetuity. It is made available under aCC-BY 4.0 International license.

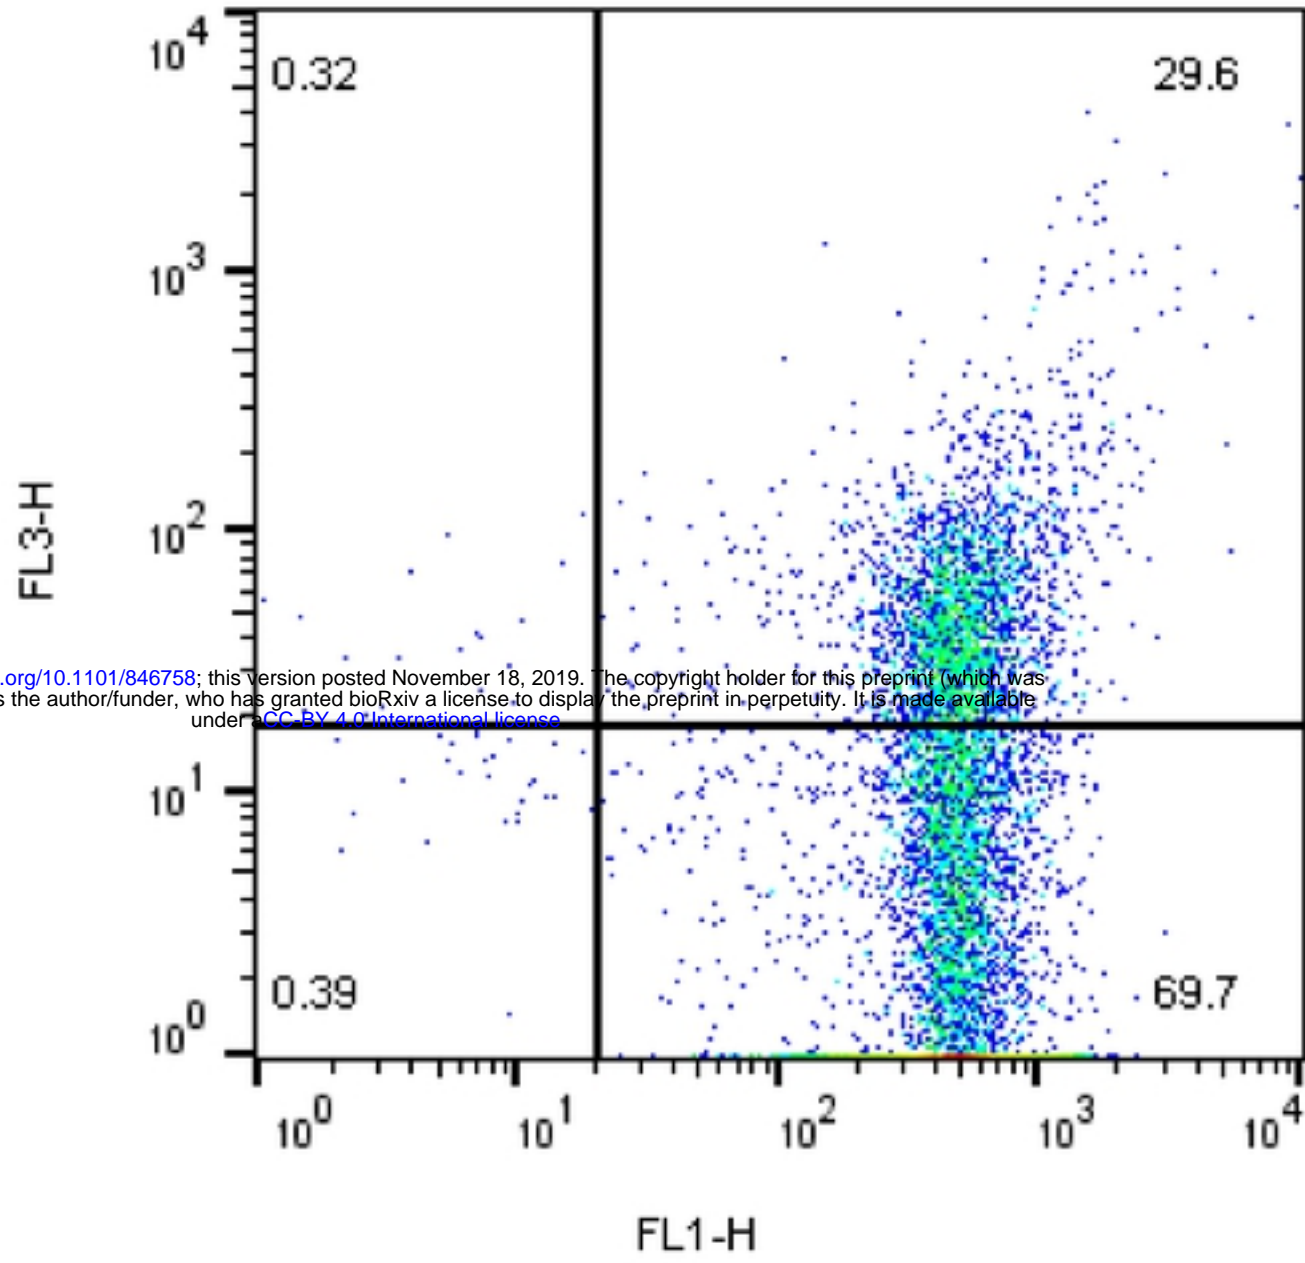

Fig. 2. Flow cytometric detection of rooster sperm stained with Rhodamine123 and PI after freeze-thaw process.

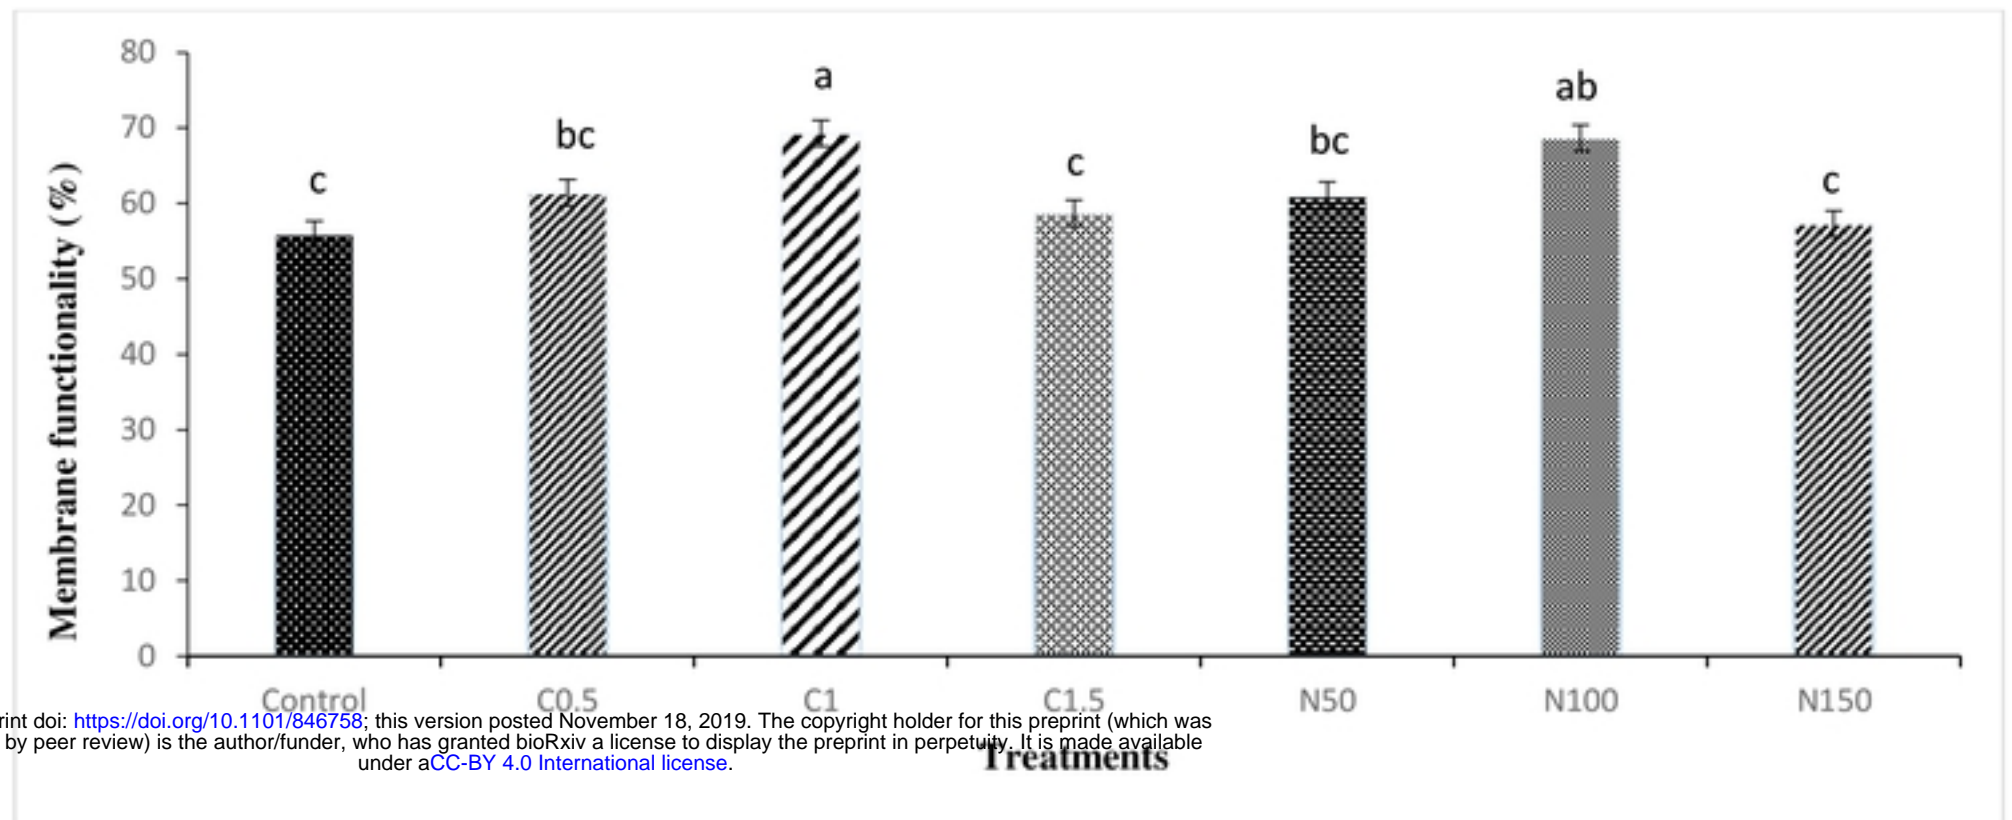

**Fig. 3. Effect of crocin and naringenin supplementation in cryopreservation medium on post-thawed membrane functionality of rooster sperm.**

Beltsville extender without antioxidant (control), C0.5 (Beltsville extender with 0.5 mM crocin), C1 (Beltsville extender with 1 mM crocin), C1.5 (Beltsville extender with 1.5 mM crocin), N50 (Beltsville extender with 50  $\mu$ M naringenin), N100 (Beltsville extender with 100  $\mu$ M naringenin), N150 (Beltsville extender with 150  $\mu$ M naringenin).



bioRxiv preprint doi: <https://doi.org/10.1101/340738>; this version posted November 18, 2019. The copyright holder for this preprint (which was not certified by peer review) is the author/funder, who has granted bioRxiv a license to display the preprint in perpetuity. It is made available under aCC-BY 4.0 International license.

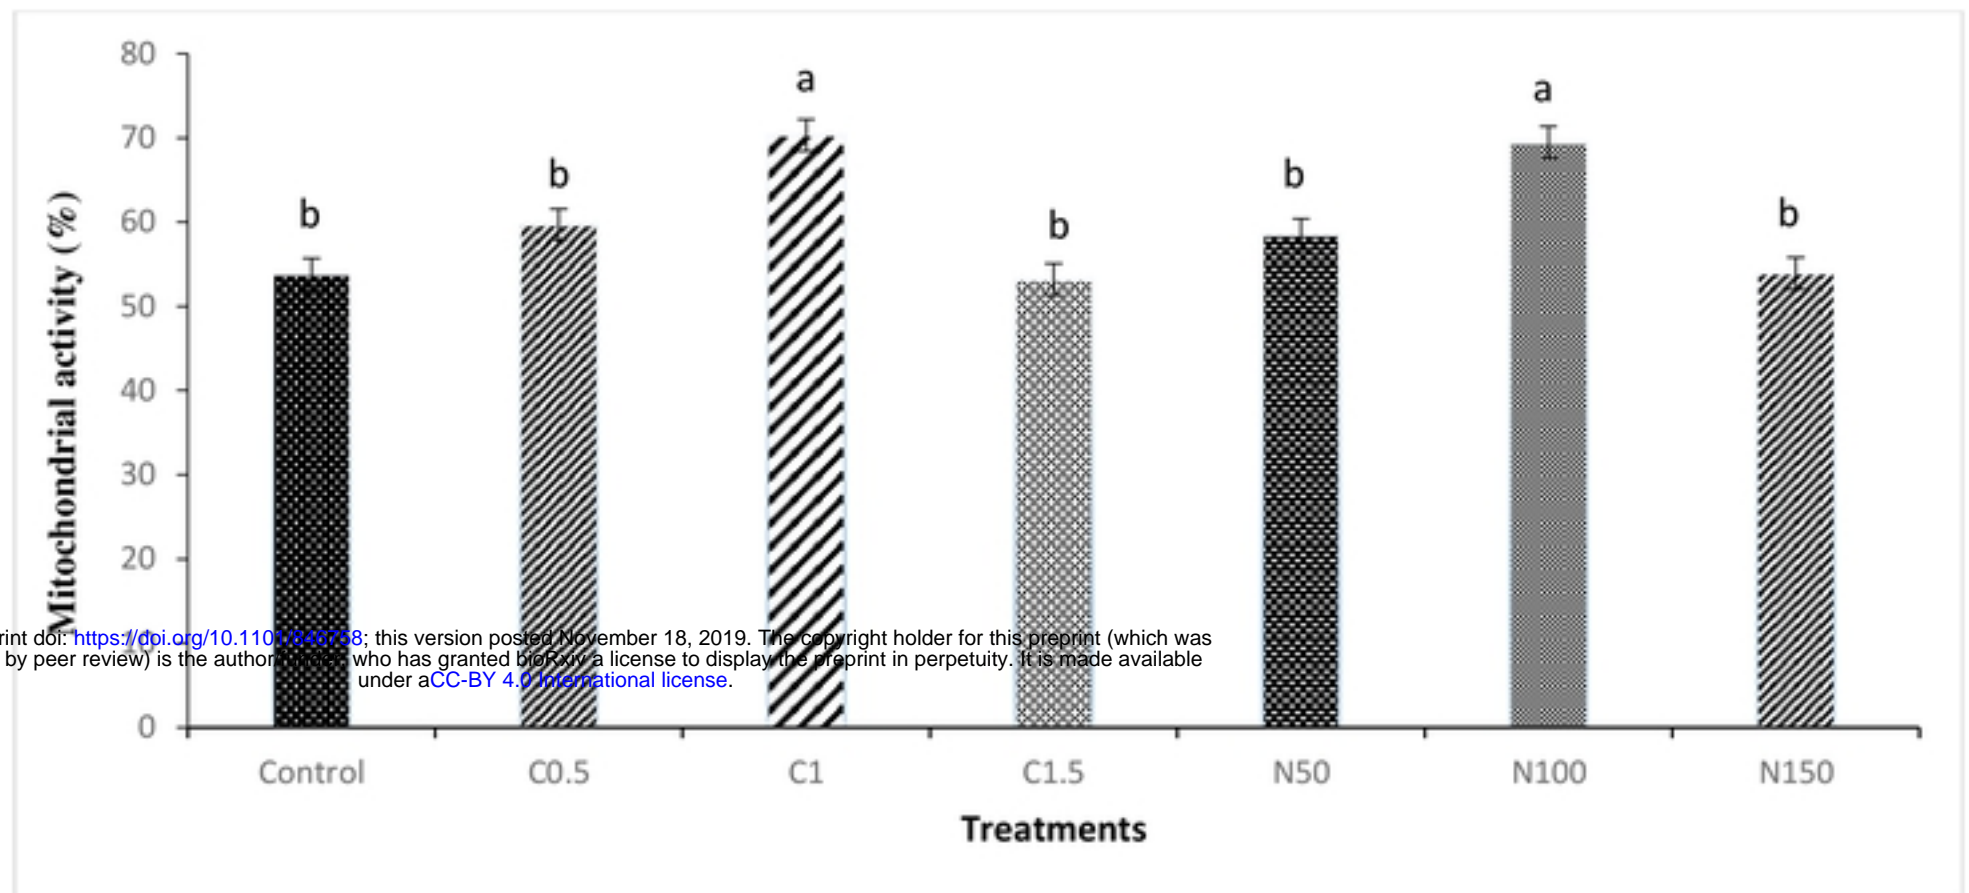

**Fig. 4. Effect of crocin and naringenin supplementation in cryopreservation medium on post-thawed mitochondrial activity of rooster sperm.**

Beltsville extender without antioxidant (control), C0.5 (Beltsville extender with 0.5 mM crocin), C1 (Beltsville extender with 1 mM crocin), C1.5 (Beltsville extender with 1.5 mM crocin), N50 (Beltsville extender with 50  $\mu$ M naringenin), N100 (Beltsville extender with 100  $\mu$ M naringenin), N150 (Beltsville extender with 150  $\mu$ M naringenin).

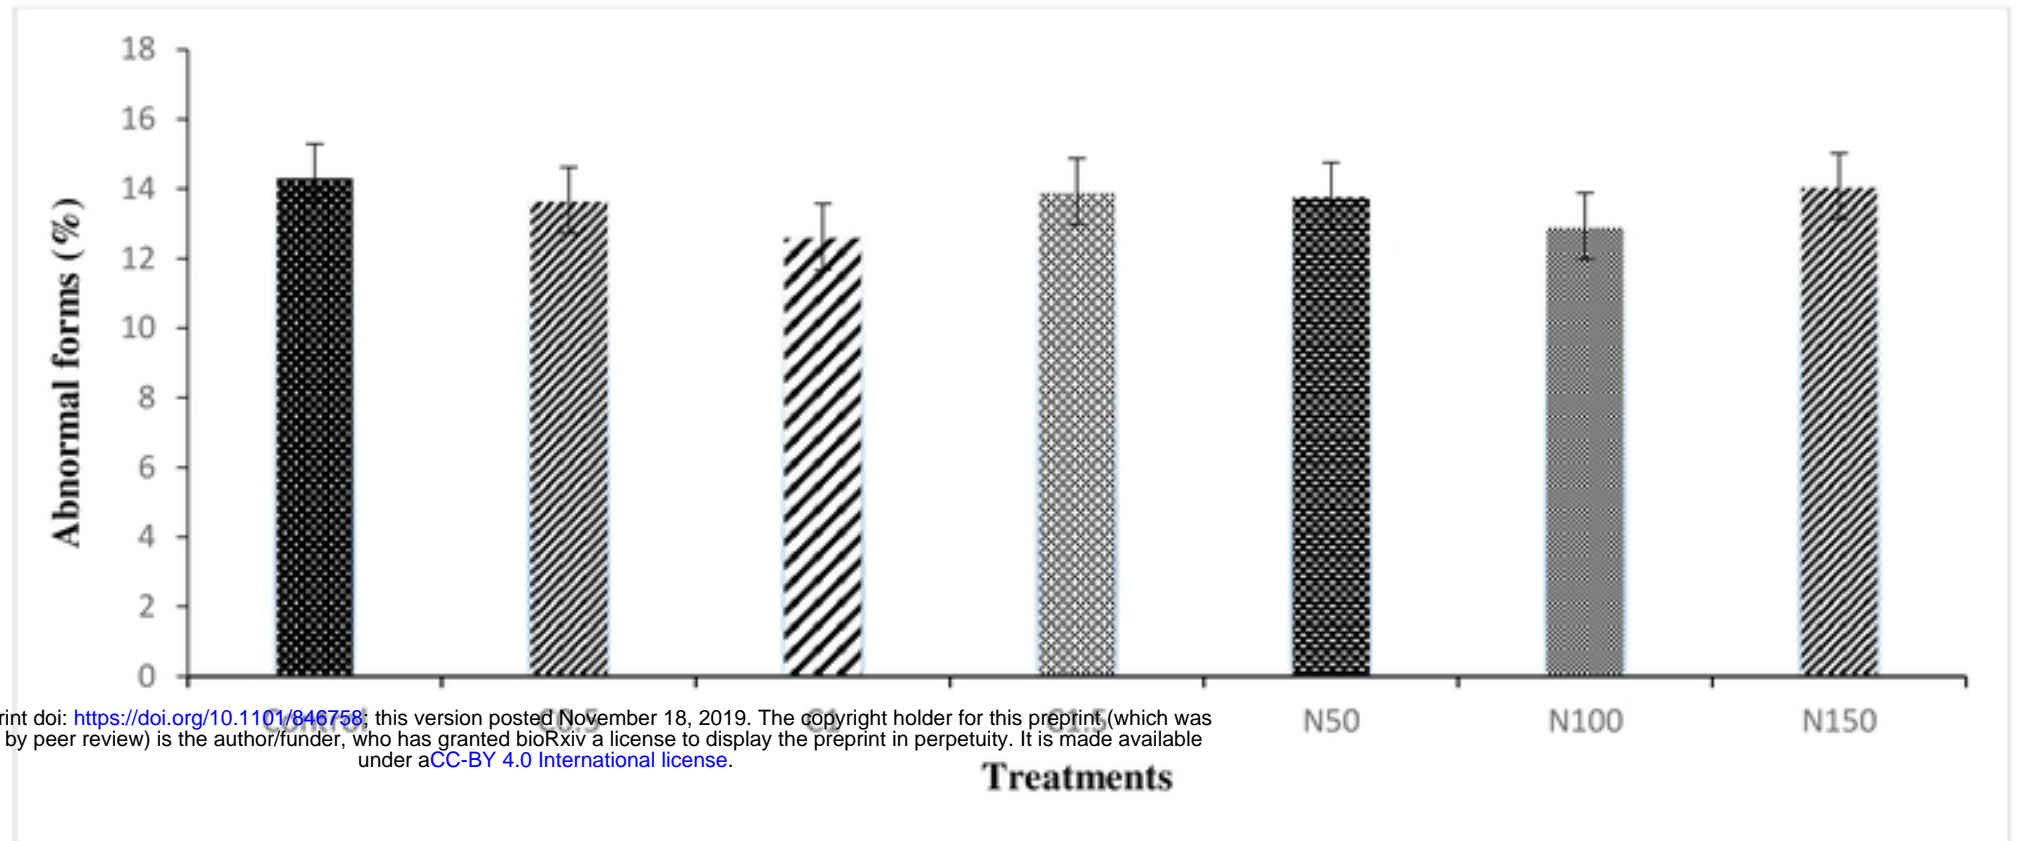

bioRxiv preprint doi: <https://doi.org/10.1101/846758>; this version posted November 18, 2019. The copyright holder for this preprint (which was not certified by peer review) is the author/funder, who has granted bioRxiv a license to display the preprint in perpetuity. It is made available under aCC-BY 4.0 International license.

**Fig. 5. Effect of crocin and naringenin supplementation in cryopreservation medium on post-thawed abnormal forms of rooster sperm.**

Beltsville extender without antioxidant (control), C0.5 (Beltsville extender with 0.5 mM crocin), C1 (Beltsville extender with 1 mM crocin), C1.5 (Beltsville extender with 1.5 mM crocin), N50 (Beltsville extender with 50  $\mu$ M naringenin), N100 (Beltsville extender with 100  $\mu$ M naringenin), N150 (Beltsville extender with 150  $\mu$ M naringenin).

bioRxiv preprint doi: <https://doi.org/10.1101/846758>; this version posted November 18, 2019. The copyright holder for this preprint (which was not certified by peer review) is the author/funder, who has granted bioRxiv a license to display the preprint in perpetuity. It is made available under aCC-BY 4.0 International license.

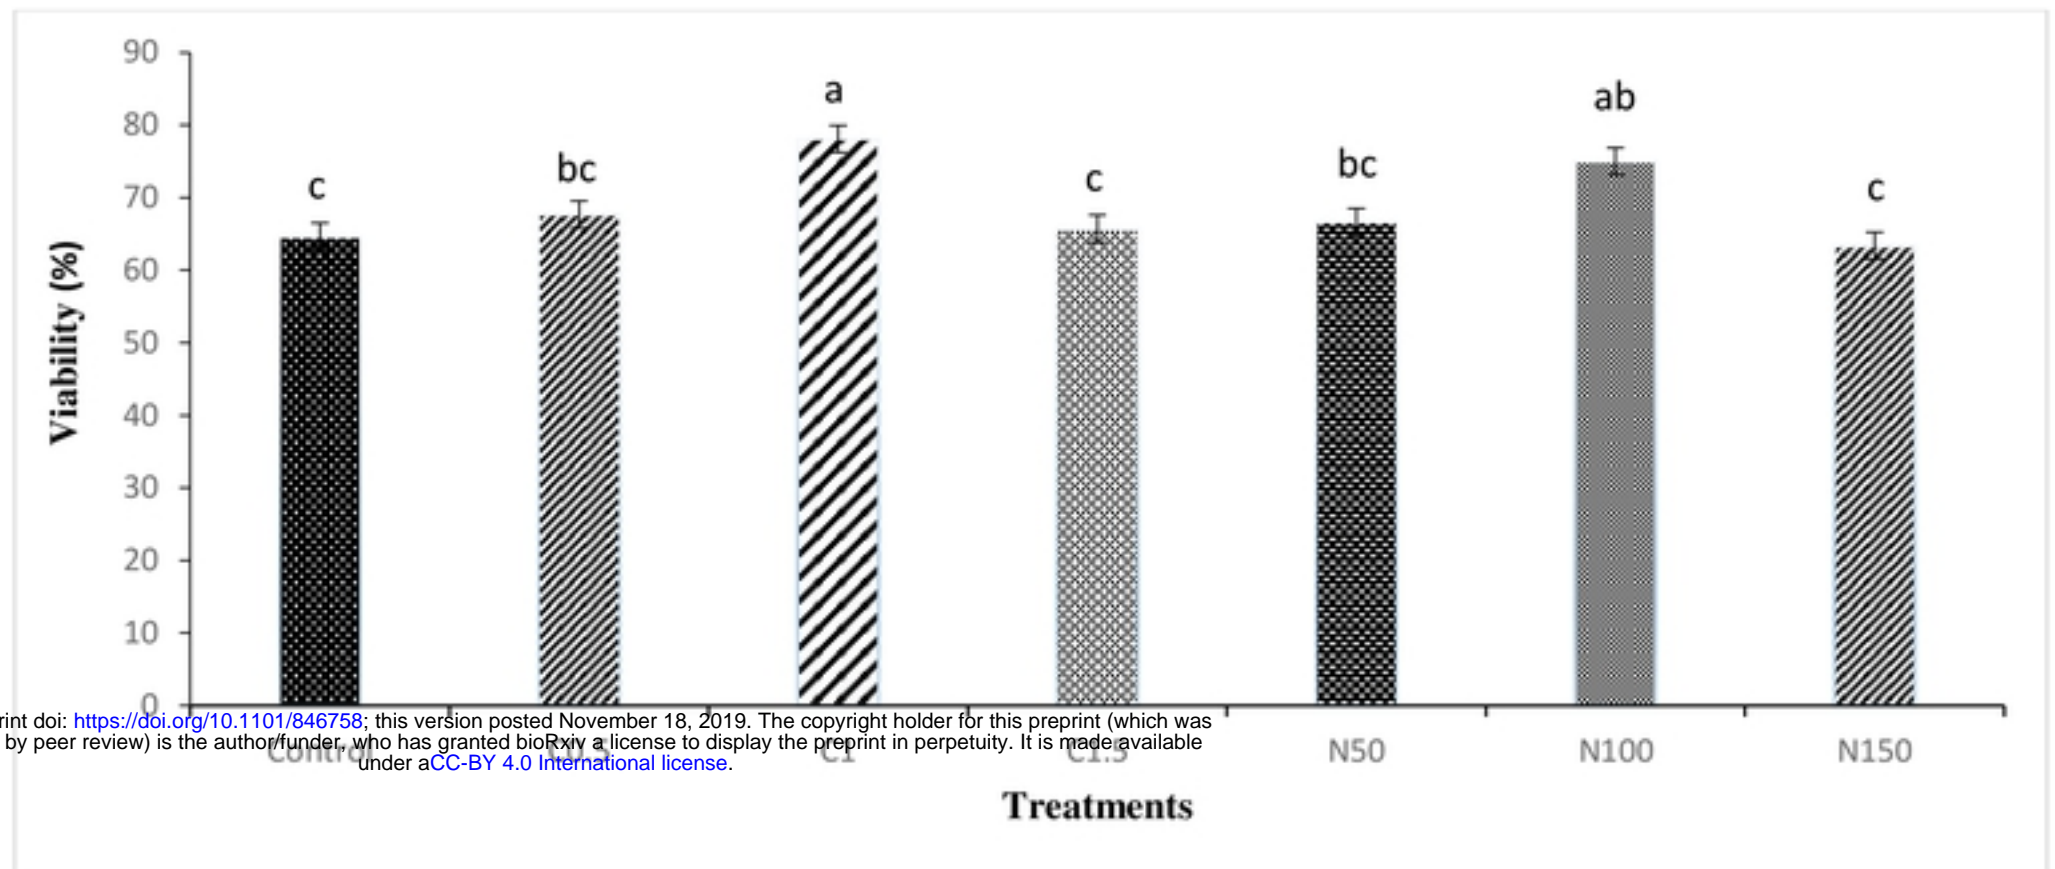

**Fig. 6.** Effect of crocin and naringenin supplementation in cryopreservation medium on post-thawed viability of rooster sperm.

Beltsville extender without antioxidant (control), C0.5 (Beltsville extender with 0.5 mM crocin), C1 (Beltsville extender with 1 mM crocin), C1.5 (Beltsville extender with 1.5 mM crocin), N50 (Beltsville extender with 50  $\mu$ M naringenin), N100 (Beltsville extender with 100  $\mu$ M naringenin), N150 (Beltsville extender with 150  $\mu$ M naringenin).



bioRxiv preprint doi: <https://doi.org/10.1101/846758>; this version posted November 18, 2019. The copyright holder for this preprint (which was not certified by peer review) is the author/funder, who has granted bioRxiv a license to display the preprint in perpetuity. It is made available under aCC-BY 4.0 International license.

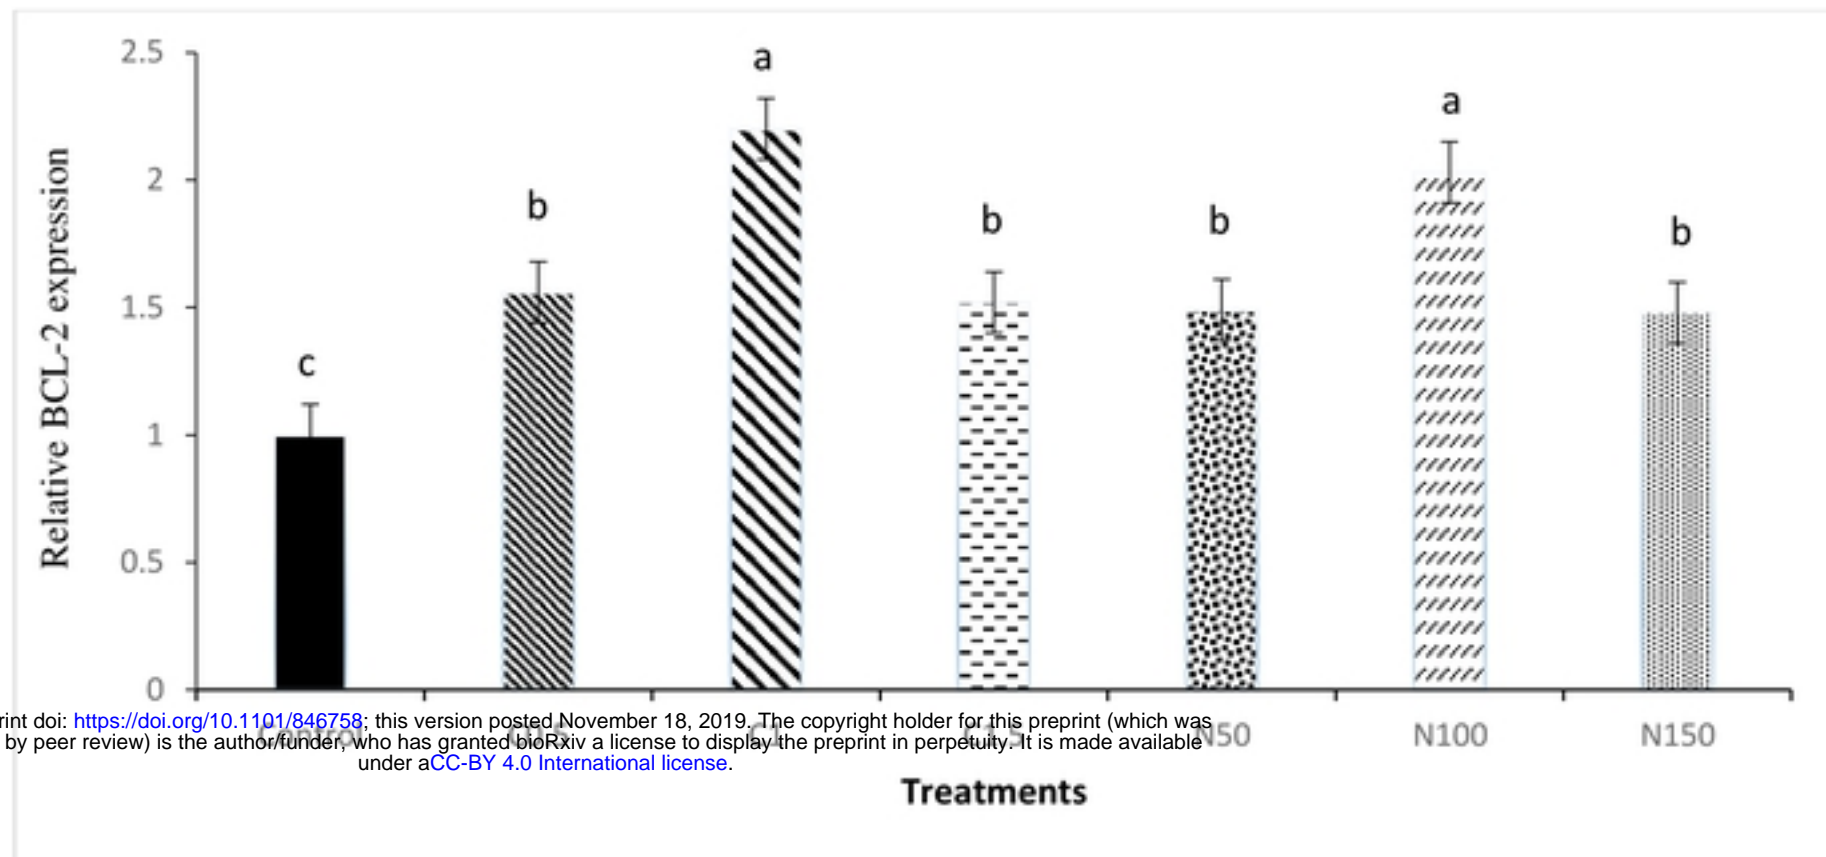

**Fig. 7. Relative mRNA expression of BCL-2 gene in the rooster sperm cryopreservation.**

Beltsville extender without antioxidant (control), C0.5 (Beltsville extender with 0.5 mM crocin), C1 (Beltsville extender with 1 mM crocin), C1.5 (Beltsville extender with 1.5 mM crocin), N50 (Beltsville extender with 50  $\mu$ M naringenin), N100 (Beltsville extender with 100  $\mu$ M naringenin), N150 (Beltsville extender with 150  $\mu$ M naringenin).

bioRxiv preprint doi: <https://doi.org/10.1101/346758>; this version posted November 18, 2019. The copyright holder for this preprint (which was not certified by peer review) is the author/funder, who has granted bioRxiv a license to display the preprint in perpetuity. It is made available under aCC-BY 4.0 International license.

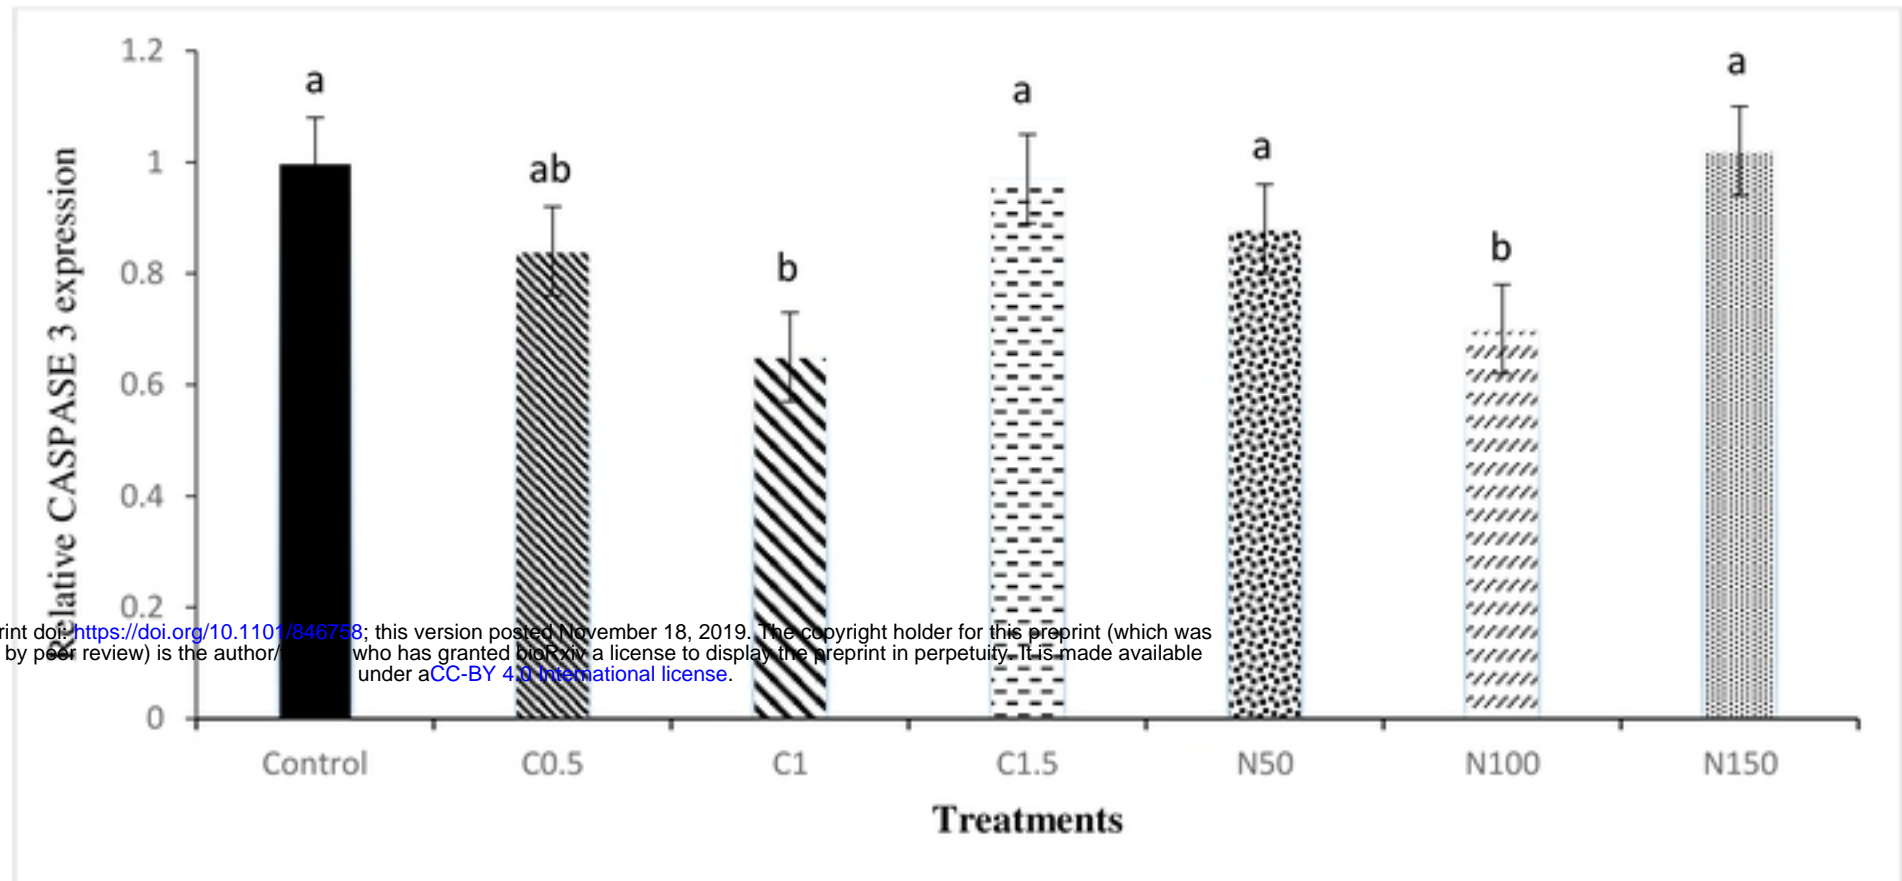

**Fig. 8. Relative mRNA expression of CASPASE 3 gene in the rooster sperm cryopreservation.**

Beltsville extender without antioxidant (control), C0.5 (Beltsville extender with 0.5 mM crocin), C1 (Beltsville extender with 1 mM crocin), C1.5 (Beltsville extender with 1.5 mM crocin), N50 (Beltsville extender with 50  $\mu$ M naringenin), N100 (Beltsville extender with 100  $\mu$ M naringenin), N150 (Beltsville extender with 150  $\mu$ M naringenin).
